# Supplementary material
Source: PubMed Central journal article supplement (PMC8114915)
Supplement: 41386_2021_961_MOESM1_ESM.pdf [file 41386_2021_961_MOESM1_ESM.pdf]

| Figures         | Statistics                                                                                                                                                                                                                                                                                                                                                                                                                                                                             |
|-----------------|----------------------------------------------------------------------------------------------------------------------------------------------------------------------------------------------------------------------------------------------------------------------------------------------------------------------------------------------------------------------------------------------------------------------------------------------------------------------------------------|
| <b>Figure 1</b> |                                                                                                                                                                                                                                                                                                                                                                                                                                                                                        |
| 1B              | <b>Breakpoints:</b> One-way ANOVA repeated measures, $F_{(1.721, 20.52)} = 11.45$ , $p = 0.0007$ ; <b>Reward earned:</b> One-way ANOVA repeated measures, $F_{(1.94, 23.25)} = 19.17$ , $p < 0.0001$                                                                                                                                                                                                                                                                                   |
| 1C              | <b>Breakpoints:</b> Two-way ANOVA repeated measures, main effect of OT: $F_{(1, 30)} = 38.60$ , $p < 0.0001$ ; main effect of sex: $F_{(1, 30)} = 5.99$ , $p = 0.020$ ; sex $\times$ OT interaction: $F_{(1, 30)} = 0.80$ , $p = 0.38$ ; <b>Reward earned:</b> Two-way ANOVA repeated measures, main effect of OT: $F_{(1, 30)} = 79.69$ , $p < 0.0001$ ; main effect of sex: $F_{(1, 30)} = 5.79$ , $p = 0.023$ ; sex $\times$ OT interaction: $F_{(1, 30)} = 0.07$ , $p = 0.79$      |
| 1D              | <b>Breakpoints:</b> Two-way ANOVA repeated measures, main effect of Ato: $F_{(1, 12)} = 19.87$ , $p = 0.0008$ ; main effect of OT: $F_{(1, 12)} = 17.49$ , $p = 0.0013$ ; Ato $\times$ OT interaction: $F_{(1, 12)} = 5.58$ , $p = 0.036$ ; <b>Reward earned:</b> Two-way ANOVA repeated measures, main effect of Ato: $F_{(1, 12)} = 26.50$ , $p = 0.0002$ ; main effect of OT: $F_{(1, 12)} = 22.67$ , $p = 0.0005$ ; Ato $\times$ OT interaction: $F_{(1, 12)} = 1.91$ , $p = 0.30$ |
| <b>Figure 2</b> |                                                                                                                                                                                                                                                                                                                                                                                                                                                                                        |
| 2A              | Two-way ANOVA, main effect of OT: $F_{(1,32)} = 16.24$ , $p = 0.0003$ ; main effect for lever: $F_{(1, 32)} = 69.28$ , $p < 0.0001$ ; lever $\times$ OT interaction: $F_{(1, 32)} = 9.11$ , $p = 0.0050$                                                                                                                                                                                                                                                                               |
| 2B              | Paired $t$ test: $t_{(16)} = 1.93$ , $p = 0.07$                                                                                                                                                                                                                                                                                                                                                                                                                                        |
| 2C              | Two-way ANOVA, OT effect: $F_{(1, 48)} = 1.31$ , $p = 0.26$                                                                                                                                                                                                                                                                                                                                                                                                                            |
| 2D              | Two-way ANOVA, main effect of stress: $F_{(1, 32)} = 19.17$ , $p = 0.0001$ ; main effect of OT: $F_{(1, 32)} = 1.67$ , $p = 0.21$ ; OT $\times$ stress interaction: $F_{(1, 32)} = 8.43$ , $p = 0.007$                                                                                                                                                                                                                                                                                 |
| 2E              | Two-way ANOVA, main effect of stress: $F_{(1, 32)} = 6.32$ , $p = 0.017$ ; main effect of OT: $F_{(1, 32)} = 0.59$ , $p = 0.45$ ; OT $\times$ stress interaction: $F_{(1, 32)} = 1.53$ , $p = 0.23$                                                                                                                                                                                                                                                                                    |
| 2F              | Two-way ANOVA, main effect of stress: $F_{(1, 32)} = 2.58$ , $p = 0.12$ ; main effect of OT: $F_{(1, 32)} = 1.36$ , $p = 0.25$ ; OT $\times$ stress interaction: $F_{(1, 32)} = 1.99$ , $p = 0.17$                                                                                                                                                                                                                                                                                     |
| 2H              | Unpaired $t$ test, $t_{(40)} = 3.20$ , $p = 0.0027$                                                                                                                                                                                                                                                                                                                                                                                                                                    |
| 2I              | Unpaired $t$ test, $t_{(40)} = 3.31$ , $p = 0.0020$                                                                                                                                                                                                                                                                                                                                                                                                                                    |
| 2J              | Unpaired $t$ test, $t_{(40)} = 2.36$ , $p = 0.023$                                                                                                                                                                                                                                                                                                                                                                                                                                     |
| 2K              | Unpaired $t$ test, $t_{(40)} = 4.92$ , $p < 0.0001$                                                                                                                                                                                                                                                                                                                                                                                                                                    |
| 2L              | Unpaired $t$ test, $t_{(40)} = 3.35$ , $p = 0.0018$                                                                                                                                                                                                                                                                                                                                                                                                                                    |
| 2M              | Unpaired $t$ test, $t_{(18)} = 0.75$ , $p = 0.46$                                                                                                                                                                                                                                                                                                                                                                                                                                      |

|                 |                                                                                                                                                                                                                                                                                                                      |
|-----------------|----------------------------------------------------------------------------------------------------------------------------------------------------------------------------------------------------------------------------------------------------------------------------------------------------------------------|
| <b>Figure 3</b> |                                                                                                                                                                                                                                                                                                                      |
| 3C              | Paired <i>t</i> test, $t_{(17)} = 12.91$ , $p < 0.0001$                                                                                                                                                                                                                                                              |
| 3D              | One-way ANOVA repeated measures, $F_{(1.59, 25.37)} = 17.82$ , $p < 0.0001$                                                                                                                                                                                                                                          |
| 3H              | Two-way ANOVA repeated measures, main effect of OT: $F_{(1, 20)} = 83.14$ , $p < 0.0001$ ; main effect of blockade of fast neurotransmission: $F_{(1, 20)} = 0.007$ , $p = 0.93$ ; OT x blockade of fast neurotransmission: $F_{(1, 20)} = 0.90$ , $p = 0.36$                                                        |
| 3I              | Two-way ANOVA repeated measures, main effect of OT: $F_{(1, 20)} = 87.92$ , $p < 0.0001$ ; main effect of blockade of fast neurotransmission: $F_{(1, 20)} = 2.01$ , $p = 0.17$ ; OT x blockade of fast neurotransmission: $F_{(1, 20)} = 0.99$ , $p = 0.33$                                                         |
| <b>Figure 4</b> |                                                                                                                                                                                                                                                                                                                      |
| 4B              | One-way ANOVA, $F_{(3, 33)} = 9.01$ , $p = 0.0002$                                                                                                                                                                                                                                                                   |
| 4D              | Paired <i>t</i> test, $t_{(7)} = 2.59$ , $p = 0.036$                                                                                                                                                                                                                                                                 |
| 4E              | Paired <i>t</i> test, $t_{(7)} = 1.91$ , $p = 0.10$                                                                                                                                                                                                                                                                  |
| 4G              | Paired <i>t</i> test, $t_{(15)} = 2.97$ , $p = 0.010$                                                                                                                                                                                                                                                                |
| 4H              | Paired <i>t</i> test, $t_{(15)} = 1.79$ , $p = 0.093$                                                                                                                                                                                                                                                                |
| <b>Figure 5</b> |                                                                                                                                                                                                                                                                                                                      |
| 5B              | Chi-square test, $\chi^2_1 = 8.21$ , $p = 0.0042$                                                                                                                                                                                                                                                                    |
| 5C              | Two-way ANOVA, main effect of age: $F_{(1, 93)} = 0.13$ , $p = 0.72$ ; main effect of sex: $F_{(1, 93)} = 0.02$ , $p = 0.90$ ; sex × age interaction: $F_{(1, 93)} = 1.19$ , $p = 0.28$                                                                                                                              |
| 5D              | Three-way ANOVA, main effect of sex: $F_{(1, 93)} = 2.57$ , $p = 0.11$ ; main effect of age: $F_{(1, 93)} = 0.89$ , $p = 0.35$ ; main effect of TGOT: $F_{(1, 93)} = 199.2$ , $p < 0.0001$ ; age × TGOT interaction: $F_{(1, 93)} = 2.33$ , $p = 0.13$ ; sex × TGOT interaction: $F_{(1, 93)} = 2.73$ , $p = 0.10$ . |
| 5F              | Chi-square test, $\chi^2_2 = 6.05$ , $p = 0.048$                                                                                                                                                                                                                                                                     |
| 5G              | Two-way ANOVA repeated measures, main effect of TGOT: $F_{(1, 58)} = 137.0$ , $p < 0.0001$ ; main effect of subregion: $F_{(2, 58)} = 1.85$ , $p = 0.17$ ; subregion × TGOT interaction: $F_{(2, 58)} = 0.89$ , $p = 0.42$ .                                                                                         |
| 5H              | Two-way ANOVA repeated measures, main effect of TGOT: $F_{(1, 58)} = 67.25$ , $p < 0.0001$ ; main effects of subregion: $F_{(2, 58)} = 3.26$ , $p = 0.045$ ; subregion × TGOT interaction: $F_{(2, 58)} = 2.89$ , $p = 0.063$ .                                                                                      |
